# Supplementary material for: Inhibition of mPGES-1 attenuates efficient resolution of acute inflammation by enhancing CX3CL1 expression
Source: Cell Death Dis. 2021 Feb 2;12(2):135. doi: 10.1038/s41419-021-03423-2 (PMC7862376; doi:10.1038/s41419-021-03423-2)
Supplement: Supplementary file 2 — Suppl. Table 1 [file 41419_2021_3423_MOESM2_ESM.xlsx]

## Sheet: top 250 DEGs
Top250 DEGs (VEH vs CIII) at day 6 (F4/80lo Mf)
ENSEMBL ID	gene name	baseMean	log2fc	lfcSE	stat	pvalue	padj
ENSMUSG00000051314	Ffar2	48.1203	2.20548	0.431752	5.10821	3.25219e-07	0.00591054
ENSMUSG00000037095	Lrg1	61.4521	1.72985	0.388289	4.45505	8.38751e-06	0.0762173
ENSMUSG00000000303	Cdh1	15.0222	1.39198	0.44161	3.15207	0.00162119	0.999219
ENSMUSG00000073418	C4b	139.045	1.34815	0.376845	3.57745	0.00034696	0.999219
ENSMUSG00000032485	Scap	39.6425	1.24359	0.404499	3.07441	0.00210921	0.999219
ENSMUSG00000057729	Prtn3	15.5547	1.22954	0.439758	2.79595	0.00517469	0.999219
ENSMUSG00000049313	Sorl1	69.6568	1.18628	0.355914	3.33304	0.000859028	0.999219
ENSMUSG00000104835	Gm5547	41.2479	1.122	0.434483	2.58238	0.0098121	0.999219
ENSMUSG00000052336	Cx3cr1	428.172	1.11232	0.374773	2.96797	0.00299772	0.999219
ENSMUSG00000052013	Btla	8.50032	1.10851	0.44037	2.51721	0.0118287	0.999219
ENSMUSG00000032012	Nectin1	40.9162	1.09941	0.407098	2.70059	0.00692162	0.999219
ENSMUSG00000001281	Itgb7	215.019	1.08835	0.339384	3.20685	0.00134197	0.999219
ENSMUSG00000021476	Habp4	30.724	1.08383	0.410991	2.63712	0.00836138	0.999219
ENSMUSG00000032763	Ilvbl	53.1657	1.07721	0.38565	2.79322	0.00521862	0.999219
ENSMUSG00000035835	Plppr3	17.0708	1.07576	0.43686	2.46248	0.0137979	0.999219
ENSMUSG00000020743	Mif4gd	172.338	1.07269	0.400102	2.68104	0.00733934	0.999219
ENSMUSG00000038235	F11r	33.9928	1.06378	0.436226	2.43861	0.0147438	0.999219
ENSMUSG00000065503	Mir351	6.46639	1.03863	0.410759	2.52858	0.0114526	0.999219
ENSMUSG00000026142	Rhbdd1	21.06	1.03472	0.420298	2.46187	0.0138214	0.999219
ENSMUSG00000023832	Acat2	10.8496	1.03464	0.437242	2.36628	0.0179679	0.999219
ENSMUSG00000001247	Lsr	79.2998	1.03396	0.392646	2.63332	0.00845535	0.999219
ENSMUSG00000107761	2010008C14Rik	20.4081	1.0189	0.427567	2.38301	0.0171716	0.999219
ENSMUSG00000074811	Hps6	25.2453	1.01275	0.441606	2.29334	0.0218287	0.999219
ENSMUSG00000040093	Bmf	12.1676	1.00048	0.441633	2.26542	0.0234871	0.999219
ENSMUSG00000030187	Klra2	259.173	0.999035	0.363293	2.74994	0.00596062	0.999219
ENSMUSG00000071176	Arhgef10	21.7349	0.988479	0.438232	2.25561	0.0240951	0.999219
ENSMUSG00000005699	Pard6a	7.0387	0.966283	0.424434	2.27664	0.0228079	0.999219
ENSMUSG00000041707	Tmem273	45.2434	0.966077	0.426463	2.26532	0.0234928	0.999219
ENSMUSG00000020577	Tspan13	35.1388	0.964157	0.436426	2.20921	0.02716	0.999219
ENSMUSG00000060586	H2-Eb1	2494.96	0.963142	0.368172	2.61601	0.00889628	0.999219
ENSMUSG00000093622	Gm20703	5.78131	0.957115	0.405426	2.36077	0.0182372	0.999219
ENSMUSG00000045038	Prkce	47.3637	0.95576	0.401952	2.3778	0.0174163	0.999219
ENSMUSG00000051969	Tlr11	5.54755	0.953165	0.397608	2.39724	0.0165189	0.999219
ENSMUSG00000021451	Sema4d	62.596	0.95197	0.414551	2.29639	0.0216536	0.999219
ENSMUSG00000048142	Nat8l	19.6598	0.947335	0.441716	2.14467	0.0319794	0.999219
ENSMUSG00000078853	Igtp	136.769	0.946248	0.436231	2.16914	0.0300718	0.999219
ENSMUSG00000074677	Sirpb1c	43.7808	0.943503	0.386511	2.44108	0.0146435	0.999219
ENSMUSG00000070705	Eid2b	7.34253	0.937052	0.429676	2.18084	0.0291955	0.999219
ENSMUSG00000006344	Ggt5	7.05235	0.934166	0.433239	2.15624	0.031065	0.999219
ENSMUSG00000003420	Fcgrt	157.073	0.933858	0.321235	2.90708	0.00364814	0.999219
ENSMUSG00000076911	Traj18	4.09775	0.932111	0.382102	2.43943	0.0147105	0.999219
ENSMUSG00000020009	Ifngr1	714.021	0.931818	0.29707	3.1367	0.0017086	0.999219
ENSMUSG00000047084	Ngrn	43.3936	0.924808	0.421943	2.19178	0.0283952	0.999219
ENSMUSG00000033356	Pus7l	15.8172	0.922602	0.44167	2.0889	0.036717	0.999219
ENSMUSG00000035364	4930524J08Rik	4.55475	0.91895	0.40764	2.25432	0.0241762	0.999219
ENSMUSG00000049600	Zbtb45	7.78367	0.917019	0.438987	2.08894	0.0367127	0.999219
ENSMUSG00000086782	E130102H24Rik	10.9985	0.915919	0.441529	2.07443	0.0380397	0.999219
ENSMUSG00000032640	Chsy1	63.8675	0.902909	0.397766	2.26995	0.0232106	0.999219
ENSMUSG00000023039	Krt7	10.571	0.889268	0.414699	2.14437
ENSMUSG00000034656	Cacna1a	14.9825	0.88207	0.428732	2.05739
ENSMUSG00000048756	Foxo3	50.8992	0.880811	0.386599	2.27836	0.0227052	0.999219
ENSMUSG00000042903	Foxo4	16.7031	0.875862	0.439984	1.99067	0.0465172	0.999219
ENSMUSG00000005043	Sgsh	45.9709	0.875711	0.388295	2.25527	0.0241163	0.999219
ENSMUSG00000005774	Rfx5	22.789	0.873229	0.422441	2.0671	0.0387245	0.999219
ENSMUSG00000039899	Fgl2	127.024	0.870107	0.432038	2.01396	0.0440139	0.999219
ENSMUSG00000018341	Il12rb2	4.02352	0.869445	0.403985	2.15217	0.0313838	0.999219
ENSMUSG00000017390	Aldoc	11.3865	0.868808	0.44142	1.96821	0.0490437	0.999219
ENSMUSG00000002602	Axl	191.427	0.868309	0.406824	2.13436	0.0328132	0.999219
ENSMUSG00000061062	Gm10093	23.6142	0.866402	0.435686	1.98859	0.0467463	0.999219
ENSMUSG00000026430	Rassf5	173.524	0.86619	0.336736	2.57231	0.0101022	0.999219
ENSMUSG00000029096	Htra3	10.7947	0.863239	0.440514	1.95962	0.0500407	0.999219
ENSMUSG00000036098	Myrf	3.40877	0.85574	0.379841	2.25289	0.0242663	0.999219
ENSMUSG00000068959	Zfp619	6.5721	0.855724	0.435405	1.96535	0.0493736	0.999219
ENSMUSG00000049299	Trappc1	78.9342	0.850126	0.383483	2.21685	0.0266332	0.999219
ENSMUSG00000087150	BC064078	24.4815	0.849646	0.415473	2.04501	0.040854	0.999219
ENSMUSG00000047731	Wbp1l	105.91	0.849073	0.343083	2.47483	0.0133299	0.999219
ENSMUSG00000039879	Heca	21.1006	0.848089	0.430899	1.96818	0.0490469	0.999219
ENSMUSG00000000861	Bcl11a	34.787	0.843589	0.415133	2.0321	0.0421439	0.999219
ENSMUSG00000010609	Psen2	60.8361	0.843201	0.386903	2.17936	0.0293051	0.999219
ENSMUSG00000030748	Il4ra	203.097	0.839453	0.353752	2.373	0.0176444	0.999219
ENSMUSG00000052928	Ctif	7.40849	0.838425	0.433189	1.93547	0.0529322	0.999219
ENSMUSG00000005267	Zfp287	10.3925	0.838097	0.439677	1.90617	0.0566288	0.999219
ENSMUSG00000075033	Nxpe3	6.06621	0.835331	0.432511	1.93135	0.0534397	0.999219
ENSMUSG00000050022	Amz1	62.5445	0.835253	0.408175	2.04631	0.0407255	0.999219
ENSMUSG00000020091	Eif4ebp2	26.8173	0.835209	0.441462	1.89192	0.0585022	0.999219
ENSMUSG00000048668	Rhno1	38.0557	0.833334	0.404821	2.05852	0.0395401	0.999219
ENSMUSG00000076498	Trbc2	8.34118	0.832846	0.439646	1.89436	0.0581778	0.999219
ENSMUSG00000025510	Cd151	38.6874	0.828562	0.390041	2.12429	0.0336458	0.999219
ENSMUSG00000106320	Gm42992	3.62484	0.826837	0.369522	2.23759	0.0252481	0.999219
ENSMUSG00000050627	Gpd1l	20.7865	0.825923	0.418623	1.97295	0.0485012	0.999219
ENSMUSG00000034330	Plcg2	239.456	0.825098	0.339015	2.43381	0.0149409	0.999219
ENSMUSG00000053318	Slamf8	48.8905	0.823813	0.386998	2.12873	0.0332768	0.999219
ENSMUSG00000053113	Socs3	130.056	0.823575	0.390832	2.10724	0.0350969	0.999219
ENSMUSG00000051256	Jagn1	21.5902	0.822819	0.417165	1.97241	0.0485632	0.999219
ENSMUSG00000028885	Smpdl3b	48.3118	0.821582	0.419042	1.96062	0.0499237	0.999219
ENSMUSG00000044447	Dock5	41.5826	0.817905	0.414923	1.97122	0.0486986	0.999219
ENSMUSG00000005373	Mlxipl	231.793	0.817112	0.405993	2.01263	0.0441537	0.999219
ENSMUSG00000072809	9330160F10Rik	22.5545	0.814972	0.42407	1.92179	0.0546327	0.999219
ENSMUSG00000033088	Triobp	37.0907	0.81462	0.419558	1.94161	0.052184	0.999219
ENSMUSG00000039852	Rere	273.344	0.80904	0.327969	2.46682	0.0136319	0.999219
ENSMUSG00000027463	Slc52a3	9.99373	0.80794	0.440872	1.8326	0.0668627	0.999219
ENSMUSG00000023990	Tfeb	29.5802	0.804618	0.427097	1.88392	0.0595754	0.999219
ENSMUSG00000030830	Itgal	136.141	0.804411	0.402409	1.99899	0.0456097	0.999219
ENSMUSG00000005237	Dnah2	4.32466	0.803062	0.394425	2.03603	0.0417473	0.999219
ENSMUSG00000031639	Tlr3	8.81015	0.802272	0.439137	1.82693	0.0677106	0.999219
ENSMUSG00000021385	Ippk	12.3836	-0.801981	0.441317	-1.81724	0.0691797	0.999219
ENSMUSG00000028772	Zcchc17	35.8064	-0.802861	0.421216	-1.90606	0.0566427	0.999219
ENSMUSG00000019850	Tnfaip3	9.52485	-0.80392	0.439372	-1.8297	0.0672942	0.999219
ENSMUSG00000006736	Tspan31	31.3907	-0.806272	0.413859	-1.94818	0.0513933	0.999219
ENSMUSG00000038828	Tmem214	33.2075	-0.808408	0.42345	-1.9091	0.0562496	0.999219
ENSMUSG00000033031	Cip2a	10.6246	-0.808943	0.432549	-1.87018	0.0614592	0.999219
ENSMUSG00000038274	Fau	129.686	-0.809107	0.359264	-2.25212	0.0243145	0.999219
ENSMUSG00000019874	Fabp7	24.301	-0.809191	0.441663	-1.83215	0.0669297	0.999219
ENSMUSG00000040269	Mrps28	11.6136	-0.810915	0.436498	-1.85778	0.063201	0.999219
ENSMUSG00000022253	Nadk2	3.58396	-0.814619	0.388741	-2.09553	0.036124	0.999219
ENSMUSG00000035367	Rmi1	11.1045	-0.816868	0.44143	-1.8505	0.0642411	0.999219
ENSMUSG00000033054	Npat	14.7322	-0.817387	0.441388	-1.85186	0.0640462	0.999219
ENSMUSG00000027306	Nusap1	10.6698	-0.819724	0.413603	-1.98191	0.0474895	0.999219
ENSMUSG00000092486	#N/A	9.91193	-0.822517	0.434138	-1.8946	0.0581455	0.999219
ENSMUSG00000091537	Tma7	10.776	-0.822861	0.44134	-1.86446	0.0622568	0.999219
ENSMUSG00000068523	Gng5	25.6692	-0.823865	0.431865	-1.90769	0.0564311	0.999219
ENSMUSG00000104044	Gm37566	18.8992	-0.828671	0.433369	-1.91216	0.0558555	0.999219
ENSMUSG00000029623	Pdap1	77.0576	-0.832809	0.389959	-2.13563	0.0327094	0.999219
ENSMUSG00000030706	Mrpl48	15.5163	-0.835896	0.435333	-1.92013	0.0548415	0.999219
ENSMUSG00000000171	Sdhd	14.7048	-0.839153	0.439925	-1.90749	0.0564569	0.999219
ENSMUSG00000016283	H2-M2	4.69761	-0.839554	0.376839	-2.22789	0.0258879	0.999219
ENSMUSG00000042541	Sem1	250.287	-0.840749	0.33356	-2.52054	0.0117176	0.999219
ENSMUSG00000003955	Fam162a	38.8041	-0.845008	0.395147	-2.13847	0.032479	0.999219
ENSMUSG00000030427	Lilra6	52.902	-0.845073	0.370798	-2.27906	0.0226634	0.999219
ENSMUSG00000024269	Tpgs2	5.60767	-0.848358	0.421928	-2.01067	0.0443606	0.999219
ENSMUSG00000031320	Rps4x	49.1779	-0.848386	0.394678	-2.14957	0.0315894	0.999219
ENSMUSG00000082465	Rps6-ps3	5.06919	-0.848778	0.421963	-2.0115	0.044273	0.999219
ENSMUSG00000004044	Cavin1	25.7765	-0.849053	0.426204	-1.99213	0.0463571	0.999219
ENSMUSG00000027533	Fabp5	28.197	-0.849757	0.436781	-1.9455	0.051715	0.999219
ENSMUSG00000023272	Creld2	38.203	-0.850669	0.399435	-2.12968	0.0331981	0.999219
ENSMUSG00000103497	Gm37407	12.66	-0.85098	0.441371	-1.92804	0.0538503	0.999219
ENSMUSG00000067017	Gm3608	5.56669	-0.851436	0.403168	-2.11186	0.0346982	0.999219
ENSMUSG00000041046	Ramp3	11.977	-0.852214	0.418031	-2.03864	0.0414859	0.999219
ENSMUSG00000047884	Klk9	6.48014	-0.85443	0.416037	-2.05373	0.0400014	0.999219
ENSMUSG00000045328	Cenpe	25.9011	-0.855303	0.43678	-1.9582	0.0502062	0.999219
ENSMUSG00000029591	Ung	6.10829	-0.855491	0.408496	-2.09425	0.0362379	0.999219
ENSMUSG00000090516	Rps11-ps1	16.2707	-0.856085	0.440392	-1.94392	0.0519054	0.999219
ENSMUSG00000037262	Kin	38.3703	-0.85623	0.416637	-2.0551	0.0398692	0.999219
ENSMUSG00000020048	Hsp90b1	787.05	-0.857062	0.372204	-2.30267	0.0212975	0.999219
ENSMUSG00000016427	Ndufa1	116.226	-0.857503	0.410321	-2.08983	0.0366327	0.999219
ENSMUSG00000017428	Psmd11	69.9655	-0.858694	0.388233	-2.2118	0.0269807	0.999219
ENSMUSG00000040204	Pclaf	12.9781	-0.859758	0.435028	-1.97633	0.0481177	0.999219
ENSMUSG00000044156	Hepacam2	6.99611	-0.860258	0.397374	-2.16486	0.0303986	0.999219
ENSMUSG00000027905	Ddx20	18.001	-0.861046	0.439752	-1.95803	0.0502268	0.999219
ENSMUSG00000032218	Ccnb2	12.5557	-0.863245	0.436257	-1.97875	0.0478438	0.999219
ENSMUSG00000038803	Ost4	48.3068	-0.865054	0.434977	-1.98874	0.0467304	0.999219
ENSMUSG00000047721	Bola2	78.6867	-0.865415	0.363504	-2.38076	0.0172771	0.999219
ENSMUSG00000026388	3110009E18Rik	6.95726	-0.866459	0.422868	-2.04901	0.0404614	0.999219
ENSMUSG00000020649	Rrm2	13.9279	-0.866999	0.42528	-2.03865	0.0414846	0.999219
ENSMUSG00000059183	Mtfmt	14.0763	-0.867027	0.437582	-1.98141	0.0475457	0.999219
ENSMUSG00000031583	Wrn	53.9078	-0.86721	0.385558	-2.24924	0.0244975	0.999219
ENSMUSG00000031644	Nek1	14.7144	-0.869299	0.438661	-1.98171	0.0475114	0.999219
ENSMUSG00000025034	Trim8	107.824	-0.872222	0.361265	-2.41436	0.015763	0.999219
ENSMUSG00000091625	Lsm5	5.96466	-0.873423	0.403198	-2.16624	0.0302932	0.999219
ENSMUSG00000030697	Ppp4c	45.1342	-0.873448	0.429321	-2.03449	0.0419025	0.999219
ENSMUSG00000005054	Cstb	130.063	-0.874196	0.359584	-2.43113	0.0150518	0.999219
ENSMUSG00000040549	Ckap5	33.5303	-0.87528	0.441714	-1.98156	0.047529	0.999219
ENSMUSG00000030983	Bccip	17.0658	-0.875704	0.431951	-2.02732	0.0426294	0.999219
ENSMUSG00000021279	Cdc42bpb	21.6401	-0.877158	0.434688	-2.0179	0.0436014	0.999219
ENSMUSG00000102211	Gm37490	26.3885	-0.879295	0.419333	-2.09689	0.0360032	0.999219
ENSMUSG00000084319	Tpt1-ps3	7.92651	-0.87932	0.414845	-2.11963	0.034037	0.999219
ENSMUSG00000036552	Ermard	31.4396	-0.880051	0.433339	-2.03086	0.0422691	0.999219
ENSMUSG00000032178	Ilf3	30.877	-0.881848	0.409108	-2.15554	0.0311198	0.999219
ENSMUSG00000025925	Terf1	27.2952	-0.883606	0.40844	-2.16337	0.0305127	0.999219
ENSMUSG00000024661	Fth1	717.057	-0.885407	0.354858	-2.49511	0.0125919	0.999219
ENSMUSG00000054408	Spcs3	54.5246	-0.885713	0.384814	-2.30166	0.0213542	0.999219
ENSMUSG00000028453	Fancg	7.19267	-0.889882	0.432163	-2.05913	0.0394814	0.999219
ENSMUSG00000000982	Ccl3	6.61006	-0.893588	0.410083	-2.17904	0.0293285	0.999219
ENSMUSG00000034906	Ncaph	8.43167	-0.895738	0.408249	-2.1941	0.0282283	0.999219
ENSMUSG00000004099	Dnmt1	69.291	-0.900291	0.386841	-2.32729	0.01995	0.999219
ENSMUSG00000047139	Cd24a	41.9962	-0.903119	0.435643	-2.07307	0.0381655	0.999219
ENSMUSG00000071669	Snx29	16.8202	-0.90675	0.438829	-2.0663	0.0388006	0.999219
ENSMUSG00000024260	Sap130	9.59156	-0.907436	0.439961	-2.06254	0.0391566	0.999219
ENSMUSG00000027160	Ccdc34	40.7445	-0.908238	0.406683	-2.23328	0.0255302	0.999219
ENSMUSG00000000204	Slfn4	110.719	-0.912174	0.414296	-2.20174	0.0276834	0.999219
ENSMUSG00000058427	Cxcl2	33.9845	-0.912345	0.440207	-2.07254	0.0382154	0.999219
ENSMUSG00000034303	Ccdc15	3.78766	-0.915776	0.387732	-2.36188	0.0181825	0.999219
ENSMUSG00000069135	Fgfr1op	14.2502	-0.917462	0.435957	-2.10448	0.035337	0.999219
ENSMUSG00000028837	Psmb2	40.3627	-0.920409	0.427771	-2.15164	0.0314257	0.999219
ENSMUSG00000050608	Minos1	106.551	-0.920513	0.352853	-2.60877	0.00908671	0.999219
ENSMUSG00000021037	Ahsa1	18.2461	-0.922076	0.436531	-2.11228	0.0346623	0.999219
ENSMUSG00000035142	Nubpl	6.7218	-0.923229	0.432721	-2.13354	0.0328804	0.999219
ENSMUSG00000037370	Enpp1	18.3508	-0.92791	0.430356	-2.15614	0.0310724	0.999219
ENSMUSG00000056629	Fkbp2	56.4533	-0.930087	0.396354	-2.3466	0.0189453	0.999219
ENSMUSG00000003810	Mast2	12.707	-0.933966	0.441645	-2.11474	0.034452	0.999219
ENSMUSG00000052477	C130026I21Rik	4.2175	-0.934512	0.400345	-2.33426	0.0195819	0.999219
ENSMUSG00000032575	Manf	74.9008	-0.9347	0.38904	-2.40258	0.0162798	0.999219
ENSMUSG00000030978	Rrm1	18.8475	-0.935387	0.441674	-2.11782	0.0341902	0.999219
ENSMUSG00000073940	Hbb-bt	20.1833	-0.941893	0.4239	-2.22197	0.0262856	0.999219
ENSMUSG00000024206	Rfx2	12.2187	-0.942267	0.441619	-2.13366	0.0328704	0.999219
ENSMUSG00000068220	Lgals1	341.849	-0.949087	0.353166	-2.68737	0.00720178	0.999219
ENSMUSG00000081968	Rpl23a-ps2	11.022	-0.950492	0.441641	-2.15218	0.0313831	0.999219
ENSMUSG00000022842	Ece2	10.7322	-0.952529	0.441643	-2.15678	0.0310226	0.999219
ENSMUSG00000083720	Gm12901	9.23409	-0.955199	0.42377	-2.25405	0.0241931	0.999219
ENSMUSG00000046179	E2f8	12.6277	-0.955731	0.433198	-2.20622	0.0273685	0.999219
ENSMUSG00000039748	Exo1	5.49947	-0.957198	0.407348	-2.34983	0.0187822	0.999219
ENSMUSG00000012405	Rpl15	21.6249	-0.958326	0.440384	-2.17611	0.0295469	0.999219
ENSMUSG00000030729	Pgm2l1	28.3797	-0.959485	0.413914	-2.31808	0.020445	0.999219
ENSMUSG00000023764	Sfi1	16.4799	-0.960359	0.431585	-2.22519	0.0260686	0.999219
ENSMUSG00000025156	Gps1	6.01662	-0.966558	0.42425	-2.27828	0.0227101	0.999219
ENSMUSG00000031245	Hmgn5	31.993	-0.971106	0.405437	-2.3952	0.0166111	0.999219
ENSMUSG00000034601	2700049A03Rik	10.0637	-0.971313	0.4393	-2.21105	0.0270325	0.999219
ENSMUSG00000032470	Mras	6.05026	-0.979823	0.407546	-2.4042	0.0162079	0.999219
ENSMUSG00000028729	Ebna1bp2	45.0593	-0.984198	0.421919	-2.33267	0.0196654	0.999219
ENSMUSG00000025395	Prim1	8.92692	-0.988765	0.431726	-2.29026	0.0220062	0.999219
ENSMUSG00000069515	Lyz1	170.066	-0.991979	0.437472	-2.26752	0.0233583	0.999219
ENSMUSG00000075229	Ccdc58	11.5158	-0.995976	0.441127	-2.2578	0.0239582	0.999219
ENSMUSG00000064360	mt-Nd3	6.01625	-0.996509	0.412636	-2.41498	0.0157359	0.999219
ENSMUSG00000024687	Osbp	26.1552	-0.996918	0.424086	-2.35074	0.0187359	0.999219
ENSMUSG00000030177	Ccdc77	16.3222	-0.999457	0.434032	-2.30272	0.0212944	0.999219
ENSMUSG00000038372	Gmds	6.43989	-1.00219	0.432465	-2.3174	0.0204819	0.999219
ENSMUSG00000060147	Serpinb6a	70.2259	-1.00604	0.433299	-2.32182	0.0202427	0.999219
ENSMUSG00000037072	Selenof	92.5285	-1.01152	0.394604	-2.56339	0.0103657	0.999219
ENSMUSG00000105936	Gm43544	14.1649	-1.01501	0.439829	-2.30774	0.0210137	0.999219
ENSMUSG00000050994	Adgb	13.9628	-1.01744	0.441155	-2.30631	0.0210932	0.999219
ENSMUSG00000025289	Prdx4	21.4958	-1.01856	0.437595	-2.32764	0.0199313	0.999219
ENSMUSG00000028333	Anp32b	218.744	-1.0191	0.316086	-3.22414	0.00126353	0.999219
ENSMUSG00000040952	Rps19	194.766	-1.01911	0.362482	-2.81148	0.00493142	0.999219
ENSMUSG00000037148	Arhgap10	13.9609	-1.02766	0.441644	-2.3269	0.0199703	0.999219
ENSMUSG00000049751	Rpl36al	143.684	-1.02884	0.407743	-2.52325	0.0116277	0.999219
ENSMUSG00000013584	Aldh1a2	35.3429	-1.03619	0.436964	-2.37134	0.0177236	0.999219
ENSMUSG00000103546	Gm37666	10.3554	-1.03674	0.420564	-2.46512	0.0136969	0.999219
ENSMUSG00000071866	Ppia	33.8741	-1.04369	0.406809	-2.56555	0.0103013	0.999219
ENSMUSG00000029516	Cit	16.0689	-1.05166	0.440265	-2.38869	0.0169085	0.999219
ENSMUSG00000108238	Gm43984	9.17902	-1.05185	0.43427	-2.42211	0.0154307	0.999219
ENSMUSG00000031107	Rbmx2	7.57155	-1.05245	0.435455	-2.4169	0.0156532	0.999219
ENSMUSG00000048078	Tenm4	22.877	-1.05725	0.436257	-2.42345	0.0153738	0.999219
ENSMUSG00000028484	Psip1	25.497	-1.05833	0.425926	-2.48477	0.0129636	0.999219
ENSMUSG00000028703	Lrrc41	17.214	-1.07222	0.436737	-2.45508	0.0140854	0.999219
ENSMUSG00000108042	B130021K23Rik	5.46209	-1.08361	0.414236	-2.61592	0.00889872	0.999219
ENSMUSG00000062328	Rpl17	94.2438	-1.0922	0.410176	-2.66275	0.00775039	0.999219
ENSMUSG00000025823	Pdia4	44.3957	-1.09269	0.441397	-2.47553
ENSMUSG00000023505	Cdca3	14.6697	-1.10044	0.435881	-2.52465	0.0115815	0.999219
ENSMUSG00000045996	Polr2k	10.3304	-1.10796	0.43935	-2.52182	0.0116749	0.999219
ENSMUSG00000028495	Rps6	13.9877	-1.10892	0.438795	-2.52719	0.0114978	0.999219
ENSMUSG00000046295	Ankle1	10.5575	-1.10991	0.42216	-2.62911	0.00856082	0.999219
ENSMUSG00000032526	Ss18l2	10.8881	-1.11349	0.441401	-2.52263	0.0116481	0.999219
ENSMUSG00000020018	Snrpf	51.9319	-1.13099	0.406562	-2.78185	0.00540502	0.999219
ENSMUSG00000019942	Cdk1	25.8657	-1.13393	0.436804	-2.59597	0.00943255	0.999219
ENSMUSG00000081715	Rps11-ps3	9.8555	-1.14805	0.433492	-2.64838	0.00808782	0.999219
ENSMUSG00000022272	Myo10	10.2658	-1.16394	0.441654	-2.63542	0.00840335	0.999219
ENSMUSG00000040824	Snrpd2	40.922	-1.19181	0.425572	-2.80048	0.0051026	0.999219
ENSMUSG00000064023	Klk8	9.12263	-1.20699	0.429902	-2.8076	0.0049912	0.999219
ENSMUSG00000003429	Rps11	288.527	-1.21474	0.418301	-2.90399	0.0036844	0.999219
ENSMUSG00000017144	Rnd3	53.2431	-1.24609	0.410414	-3.03617	0.00239606	0.999219
ENSMUSG00000035352	Ccl12	10.1488	-1.27305	0.428994	-2.96751	0.0030022	0.999219
ENSMUSG00000022890	Atp5j	111.032	-1.30466	0.398006	-3.27799	0.0010455	0.999219
ENSMUSG00000035373	Ccl7	15.0326	-1.35521	0.440308	-3.07788	0.0020848	0.999219
ENSMUSG00000026928	Card9	55.7382	-1.38683	0.391214	-3.54494	0.0003927	0.999219
ENSMUSG00000054717	Hmgb2	19.6589	-1.40203	0.433535	-3.23396	0.00122088	0.999219
ENSMUSG00000062997	Rpl35	56.5424	-1.44606	0.428008	-3.37858	0.000728609	0.999219
ENSMUSG00000029217	Tec	8.43729	-1.44915	0.434808	-3.33284	0.000859632	0.999219
ENSMUSG00000018293	Pfn1	207.601	-1.55458	0.373191	-4.16563	3.10498e-05	0.143026
ENSMUSG00000035385	Ccl2	50.4725	-1.58598	0.392907	-4.03652	5.42509e-05	0.197191
ENSMUSG00000026390	Marco	126.401	-1.66908	0.400982	-4.16249	3.14792e-05	0.143026
