# Supplementary material for: Inhibition of mPGES-1 attenuates efficient resolution of acute inflammation by enhancing CX3CL1 expression
Source: Cell Death Dis. 2021 Feb 2;12(2):135. doi: 10.1038/s41419-021-03423-2 (PMC7862376; doi:10.1038/s41419-021-03423-2)
Supplement: Supplementary file 3 — Suppl. Table 2 [file 41419_2021_3423_MOESM3_ESM.xlsx]

## Sheet: top 250 DEGs
Top250 DEGs (VEH vs CIII) at day 6 (F4/80hi Mf)
ENSEMBL ID	gene name	baseMean	log2fc	lfcSE	stat	pvalue	padj
ENSMUSG00000060586	H2-Eb1	798.342	1.57474	0.4681	3.36412	0.000767881	0.999843
ENSMUSG00000073421	H2-Ab1	1099.24	1.51033	0.452014	3.34135	0.000833734	0.999843
ENSMUSG00000020387	Jade2	26.6129	1.40539	0.459956	3.05548	0.00224699	0.999843
ENSMUSG00000035673	Sbno2	10.7735	1.39572	0.470594	2.96586	0.00301842	0.999843
ENSMUSG00000036594	H2-Aa	1207.6	1.33082	0.437037	3.04509	0.00232608	0.999843
ENSMUSG00000100147	1700047M11Rik	7.79231	1.2841	0.467265	2.74812	0.00599386	0.999843
ENSMUSG00000025870	Arl10	17.1857	1.22488	0.463617	2.64201	0.00824146	0.999843
ENSMUSG00000034430	Zxdc	10.5861	1.21323	0.468718	2.5884	0.00964241	0.999843
ENSMUSG00000027864	Ptgfrn	40.2078	1.17436	0.413961	2.83688	0.00455562	0.999843
ENSMUSG00000072812	Ahnak2	51.6018	1.15936	0.454764	2.54938	0.0107916	0.999843
ENSMUSG00000103343	Gm37052	16.8346	1.14552	0.449231	2.54996	0.0107735	0.999843
ENSMUSG00000078247	Airn	10.5095	1.13342	0.468287	2.42036	0.0155052	0.999843
ENSMUSG00000022358	Fbxo32	35.6713	1.13084	0.466978	2.4216	0.0154523	0.999843
ENSMUSG00000024610	Cd74	672.732	1.12532	0.461309	2.43941	0.0147111	0.999843
ENSMUSG00000032666	1700025G04Rik	13.1689	1.07873	0.465153	2.31908	0.0203908	0.999843
ENSMUSG00000030055	Rab43	30.6848	1.07154	0.418826	2.55844	0.0105144	0.999843
ENSMUSG00000020109	Dnajb12	14.0206	1.06254	0.458686	2.31648	0.0205321	0.999843
ENSMUSG00000106288	Gm43593	5.11267	1.06023	0.427673	2.47907	0.0131726	0.999843
ENSMUSG00000097375	6720427I07Rik	35.5893	1.0477	0.417944	2.5068	0.0121829	0.999843
ENSMUSG00000093314	Mir5136	7.82742	1.04116	0.470097	2.21477	0.026776	0.999843
ENSMUSG00000001281	Itgb7	168.845	1.03323	0.356271	2.90011	0.00373027	0.999843
ENSMUSG00000048756	Foxo3	44.9657	1.02949	0.410702	2.50665	0.012188	0.999843
ENSMUSG00000018459	Slc13a3	4.24924	1.02598	0.441228	2.32529	0.0200567	0.999843
ENSMUSG00000104969	Gm43445	5.42286	1.00865	0.456845	2.20787	0.0272536	0.999843
ENSMUSG00000029475	Kdm2b	16.4461	1.0013	0.45303	2.21022	0.0270897	0.999843
ENSMUSG00000015243	Abca1	159.901	0.997317	0.387672	2.57258	0.0100943	0.999843
ENSMUSG00000019189	Rnf145	107.143	0.994772	0.379872	2.6187	0.00882651	0.999843
ENSMUSG00000026463	Atp2b4	78.6748	0.987673	0.465985	2.11954	0.0340451	0.999843
ENSMUSG00000055866	Per2	13.311	0.986766	0.470772	2.09606	0.0360767	0.999843
ENSMUSG00000057329	Bcl2	61.0212	0.973552	0.37974	2.56374	0.0103552	0.999843
ENSMUSG00000032238	Rora	24.0063	0.966317	0.455748	2.12029	0.033982	0.999843
ENSMUSG00000022504	Ciita	22.6951	0.958364	0.45215	2.11957	0.0340423	0.999843
ENSMUSG00000042719	Naa25	50.655	0.955638	0.40493	2.36001	0.0182745	0.999843
ENSMUSG00000006800	Sulf2	118.106	0.954967	0.370527	2.57732	0.00995699	0.999843
ENSMUSG00000103123	Gm37390	17.2537	0.952546	0.471926	2.01842	0.0435475	0.999843
ENSMUSG00000018796	Acsl1	22.9968	0.94883	0.448321	2.11641	0.03431	0.999843
ENSMUSG00000004642	Slbp	18.1021	0.946237	0.451831	2.09423	0.0362399	0.999843
ENSMUSG00000032849	Abcc4	41.1388	0.943475	0.411745	2.29141	0.0219398	0.999843
ENSMUSG00000022672	Prkdc	10.8481	0.943105	0.468267	2.01403	0.0440062	0.999843
ENSMUSG00000044573	Acp1	10.6076	0.937544	0.455489	2.05832
ENSMUSG00000009418	Nav1	312.258	0.935865	0.318982	2.93391	0.00334725	0.999843
ENSMUSG00000052336	Cx3cr1	66.4367	0.934834	0.455221	2.05358	0.0400159	0.999843
ENSMUSG00000002602	Axl	49.8728	0.931862	0.456094	2.04313	0.0410392	0.999843
ENSMUSG00000103041	Gm37305	7.10558	0.930927	0.468804	1.98575	0.0470611	0.999843
ENSMUSG00000038371	Sbf2	67.1093	0.927597	0.357878	2.59194	0.00954377	0.999843
ENSMUSG00000026627	Tmem206	5.23804	0.923723	0.455355	2.02858	0.0425013	0.999843
ENSMUSG00000038697	Taf5l	35.5773	0.922371	0.399687	2.30774	0.0210139	0.999843
ENSMUSG00000039116	Adgrg6	30.2328	0.920922	0.426461	2.15945	0.030815	0.999843
ENSMUSG00000039873	Neurl2	15.4775	0.918928	0.471841	1.94754	0.0514702	0.999843
ENSMUSG00000004105	Angptl2	9.09193	0.918815	0.461209	1.99219	0.0463505	0.999843
ENSMUSG00000030691	Fchsd2	18.4445	0.91657	0.462428	1.98208	0.0474704	0.999843
ENSMUSG00000035798	Zdhhc17	11.7461	0.910979	0.471796	1.93087	0.0534987	0.999843
ENSMUSG00000024180	Tmem8	58.0825	0.909181	0.440954	2.06185	0.0392222	0.999843
ENSMUSG00000039308	Ndst2	94.0707	0.908475	0.36507	2.4885	0.0128284	0.999843
ENSMUSG00000108633	Gm44694	50.1106	0.903393	0.451764	1.9997	0.0455325	0.999843
ENSMUSG00000039286	Fndc3b	149.843	0.902234	0.437077	2.06425	0.0389944	0.999843
ENSMUSG00000029765	Plxna4	10.4782	0.895225	0.472331	1.89533	0.0580484	0.999843
ENSMUSG00000047909	Ankrd16	51.4696	0.893006	0.391441	2.28133	0.0225289	0.999843
ENSMUSG00000032640	Chsy1	44.8908	0.892216	0.441361	2.02151	0.0432268	0.999843
ENSMUSG00000013236	Ptprs	56.9902	0.891351	0.434844	2.04981	0.0403825	0.999843
ENSMUSG00000017176	Nt5c3b	7.60549	-0.891105	0.470409	-1.89432	0.0581826	0.999843
ENSMUSG00000038274	Fau	119.136	-0.891225	0.421792	-2.11295	0.0346051	0.999843
ENSMUSG00000039016	Timm8b	32.6186	-0.8967	0.405262	-2.21264	0.0269223	0.999843
ENSMUSG00000105814	Mir703	113.441	-0.897135	0.452015	-1.98475	0.0471726	0.999843
ENSMUSG00000028367	Txn1	884.945	-0.899742	0.384942	-2.33734	0.0194213	0.999843
ENSMUSG00000061477	Rps7	81.3694	-0.900064	0.395376	-2.27648	0.0228175	0.999843
ENSMUSG00000027533	Fabp5	122.073	-0.900268	0.466732	-1.92888	0.0537463	0.999843
ENSMUSG00000038690	Atp5j2	214.318	-0.900693	0.343073	-2.62537	0.00865559	0.999843
ENSMUSG00000013822	Elof1	30.4129	-0.901021	0.412586	-2.18384	0.0289741	0.999843
ENSMUSG00000036992	Nxt1	14.2704	-0.902661	0.450555	-2.00344	0.04513	0.999843
ENSMUSG00000047675	Rps8	525.933	-0.903116	0.350742	-2.57487	0.0100277	0.999843
ENSMUSG00000074800	Gm4149	46.0937	-0.903728	0.463236	-1.9509	0.0510688	0.999843
ENSMUSG00000029198	Grpel1	21.8773	-0.90538	0.443792	-2.0401	0.0413405	0.999843
ENSMUSG00000074412	Gm10689	34.8193	-0.907513	0.470831	-1.92747	0.053921	0.999843
ENSMUSG00000022956	Atp5o	130.687	-0.909034	0.386945	-2.34926	0.0188107	0.999843
ENSMUSG00000060419	Rps16-ps2	14.9927	-0.910169	0.471856	-1.92891	0.0537419	0.999843
ENSMUSG00000028609	Magoh	90.8857	-0.910389	0.376494	-2.41807	0.0156032	0.999843
ENSMUSG00000028648	Ndufs5	11.279	-0.910449	0.464688	-1.95927	0.0500815	0.999843
ENSMUSG00000050608	Minos1	160.045	-0.911086	0.376306	-2.42113	0.0154723	0.999843
ENSMUSG00000052485	Tmem171	3.05998	-0.912115	0.434273	-2.10033	0.0357001	0.999843
ENSMUSG00000010406	Mrpl52	73.8909	-0.912449	0.400819	-2.27646	0.0228184	0.999843
ENSMUSG00000025967	Eef1b2	299.258	-0.912564	0.319994	-2.85182	0.00434699	0.999843
ENSMUSG00000038462	Uqcrfs1	93.3735	-0.914896	0.411994	-2.22066	0.0263743	0.999843
ENSMUSG00000018585	Atox1	114.63	-0.918145	0.369322	-2.48603	0.0129177	0.999843
ENSMUSG00000008036	Ap2s1	150.314	-0.918535	0.362558	-2.53348	0.0112936	0.999843
ENSMUSG00000090862	Rps13	295.813	-0.91872	0.358976	-2.55928	0.0104889	0.999843
ENSMUSG00000015804	Med28	73.9219	-0.919436	0.34979	-2.62853	0.00857537	0.999843
ENSMUSG00000021619	Atg10	8.87144	-0.919463	0.472076	-1.9477	0.0514507	0.999843
ENSMUSG00000049124	Gm8186	10.6568	-0.922235	0.472219	-1.95298	0.0508216	0.999843
ENSMUSG00000028089	Chd1l	11.4345	-0.924105	0.467452	-1.9769	0.0480531	0.999843
ENSMUSG00000009927	Rps25	289.723	-0.927164	0.355454	-2.60839	0.00909692	0.999843
ENSMUSG00000008892	Vdac3	8.47686	-0.927864	0.472294	-1.96459	0.0494617	0.999843
ENSMUSG00000020460	Rps27a	224.677	-0.928086	0.432273	-2.14699	0.0317942	0.999843
ENSMUSG00000016833	Mrps18c	31.1561	-0.9286	0.422003	-2.20046	0.0277744	0.999843
ENSMUSG00000058076	Sdhc	65.9855	-0.929664	0.371724	-2.50095	0.0123861	0.999843
ENSMUSG00000022452	Smdt1	143.227	-0.930788	0.37358	-2.49153	0.0127193	0.999843
ENSMUSG00000085890	Tnfsf13os	7.6951	-0.933649	0.465271	-2.00668	0.0447838	0.999843
ENSMUSG00000045273	Cenph	12.1604	-0.933801	0.471787	-1.97928	0.047784	0.999843
ENSMUSG00000005575	Ube2m	16.7354	-0.934042	0.471491	-1.98104	0.0475867	0.999843
ENSMUSG00000016257	Prelid3b	63.974	-0.935215	0.368706	-2.53648	0.0111974	0.999843
ENSMUSG00000035674	Ndufa3	136.392	-0.935367	0.392944	-2.38041	0.0172935	0.999843
ENSMUSG00000074129	Rpl13a	428.486	-0.936045	0.391774	-2.38925	0.0168829	0.999843
ENSMUSG00000032399	Rpl4	651.79	-0.942339	0.405311	-2.32498	0.0200733	0.999843
ENSMUSG00000027955	Fam198b	14.4169	-0.942403	0.47236	-1.99509	0.0460327	0.999843
ENSMUSG00000097290	1300002E11Rik	21.32	-0.944754	0.45998	-2.0539	0.0399849	0.999843
ENSMUSG00000025145	Lrrc45	20.7177	-0.9448	0.43557	-2.16911	0.0300741	0.999843
ENSMUSG00000071528	Usmg5	110.164	-0.944885	0.467456	-2.02133	0.0432451	0.999843
ENSMUSG00000033475	Tomm6	6.12031	-0.945685	0.465735	-2.03052	0.0423036	0.999843
ENSMUSG00000022634	Yaf2	55.5199	-0.945816	0.429271	-2.2033	0.0275733	0.999843
ENSMUSG00000031840	Rab3a	7.52153	-0.946525	0.466491	-2.02903	0.042455	0.999843
ENSMUSG00000060143	Gm10076	19.2143	-0.946527	0.471374	-2.00802	0.0446414	0.999843
ENSMUSG00000061518	Cox5b	89.3018	-0.94656	0.382267	-2.47617	0.0132799	0.999843
ENSMUSG00000098318	Lockd	11.697	-0.948367	0.470315	-2.01645	0.0437526	0.999843
ENSMUSG00000003970	Rpl8	348.472	-0.948664	0.298589	-3.17715	0.00148728	0.999843
ENSMUSG00000028998	Tomm7	289.024	-0.94925	0.38367	-2.47413	0.013356	0.999843
ENSMUSG00000029623	Pdap1	88.2395	-0.949987	0.430426	-2.20708	0.0273082	0.999843
ENSMUSG00000027907	S100a11	222.134	-0.950268	0.391546	-2.42697	0.0152257	0.999843
ENSMUSG00000018930	Ccl4	27.9536	-0.953715	0.439194	-2.17151	0.0298923	0.999843
ENSMUSG00000061286	Exosc5	22.3795	-0.954675	0.438898	-2.17516	0.0296178	0.999843
ENSMUSG00000010911	Apip	17.9584	-0.954823	0.454708	-2.09986	0.035741	0.999843
ENSMUSG00000024953	Prdx5	588.694	-0.955992	0.42042	-2.2739	0.0229722	0.999843
ENSMUSG00000085897	Gm11604	10.1557	-0.956002	0.469643	-2.03559	0.0417912	0.999843
ENSMUSG00000005233	Spc25	17.8482	-0.956196	0.472415	-2.02406	0.0429641	0.999843
ENSMUSG00000025508	Rplp2	211.376	-0.956417	0.459837	-2.07991	0.037534	0.999843
ENSMUSG00000018286	Psmb6	115.724	-0.957588	0.373886	-2.56118	0.0104319	0.999843
ENSMUSG00000007872	Id3	10.0807	-0.957765	0.452884	-2.11481	0.034446	0.999843
ENSMUSG00000004945	Tmem242	26.1941	-0.959551	0.415232	-2.31088	0.0208394	0.999843
ENSMUSG00000028443	Nudt2	13.2447	-0.961373	0.472213	-2.03589	0.0417618	0.999843
ENSMUSG00000039356	Exosc2	8.83235	-0.963935	0.472406	-2.04048	0.0413025	0.999843
ENSMUSG00000047459	Dynlrb1	66.0589	-0.964726	0.370682	-2.60257	0.00925279	0.999843
ENSMUSG00000050299	Gm9843	48.7448	-0.966099	0.419399	-2.30353	0.021249	0.999843
ENSMUSG00000032113	Chek1	5.38759	-0.968621	0.453767	-2.13462	0.0327921	0.999843
ENSMUSG00000032330	Cox7a2	199.968	-0.969112	0.373189	-2.59684	0.00940854	0.999843
ENSMUSG00000041046	Ramp3	30.6992	-0.969514	0.469981	-2.06288	0.039124	0.999843
ENSMUSG00000037563	Rps16	123.074	-0.970464	0.457101	-2.12309	0.0337467	0.999843
ENSMUSG00000045160	Bola3	24.0049	-0.973332	0.449275	-2.16645	0.0302768	0.999843
ENSMUSG00000032518	Rpsa	91.845	-0.977119	0.354525	-2.75614	0.00584885	0.999843
ENSMUSG00000078193	Gm2000	20.011	-0.977976	0.457333	-2.13844	0.0324814	0.999843
ENSMUSG00000032959	Pebp1	44.4745	-0.980383	0.40175	-2.44028	0.0146757	0.999843
ENSMUSG00000032575	Manf	89.339	-0.983593	0.367246	-2.67829	0.00739985	0.999843
ENSMUSG00000002416	Ndufb2	66.2443	-0.985087	0.423857	-2.3241	0.0201201	0.999843
ENSMUSG00000033429	Mcee	30.9098	-0.986821	0.435313	-2.26692	0.0233951	0.999843
ENSMUSG00000046753	Ccdc66	15.3425	-0.986874	0.470358	-2.09814	0.0358931	0.999843
ENSMUSG00000096199	Ptrhd1	17.8335	-0.987653	0.458403	-2.15455	0.0311968	0.999843
ENSMUSG00000030148	Clec4a2	48.1995	-0.988593	0.388261	-2.54621	0.0108901	0.999843
ENSMUSG00000019837	Gtf3c6	48.501	-0.989377	0.405808	-2.43804	0.014767	0.999843
ENSMUSG00000020022	Ndufa12	48.4273	-0.993905	0.396881	-2.50429	0.0122698	0.999843
ENSMUSG00000027673	Ndufb5	126.441	-0.995576	0.395322	-2.51839	0.0117893	0.999843
ENSMUSG00000085116	Gm2735	3.49422	-0.998849	0.429621	-2.32495	0.0200745	0.999843
ENSMUSG00000006057	Atp5g1	33.3999	-1.00363	0.445691	-2.25185	0.0243321	0.999843
ENSMUSG00000045690	Wdr89	58.4299	-1.00375	0.454796	-2.20704	0.0273113	0.999843
ENSMUSG00000069188	Gm13192	4.93791	-1.00837	0.451872	-2.23154	0.0256451	0.999843
ENSMUSG00000069792	Wfdc17	1285.03	-1.00849	0.452455	-2.22893	0.0258187	0.999843
ENSMUSG00000087659	Gm12606	7.57423	-1.00928	0.448568	-2.25001	0.0244484	0.999843
ENSMUSG00000023272	Creld2	41.259	-1.01254	0.386809	-2.61768	0.00885298	0.999843
ENSMUSG00000083911	Gm4342	9.59103	-1.01257	0.460551	-2.1986	0.0279066	0.999843
ENSMUSG00000031158	Timm17b	21.9729	-1.0133	0.426184	-2.37761	0.0174252	0.999843
ENSMUSG00000000740	Rpl13	643.653	-1.01338	0.338843	-2.99071	0.00278332	0.999843
ENSMUSG00000062997	Rpl35	87.8373	-1.01381	0.461751	-2.19557
ENSMUSG00000039001	Rps21	785.557	-1.0169	0.375511	-2.70803	0.00676834	0.999843
ENSMUSG00000073616	Cops9	264.996	-1.01701	0.357207	-2.84712	0.00441162	0.999843
ENSMUSG00000089929	Bcl2a1b	48.7464	-1.01731	0.451386	-2.25376	0.0242115	0.999843
ENSMUSG00000044206	Vsig4	27.7777	-1.02076	0.472214	-2.16165	0.030645	0.999843
ENSMUSG00000042462	Dctpp1	18.1225	-1.02309	0.456748	-2.23995	0.0250944	0.999843
ENSMUSG00000095288	Gm7618	12.528	-1.02379	0.472108	-2.16856	0.0301163	0.999843
ENSMUSG00000083992	Gm11478	38.1275	-1.02656	0.469835	-2.18493	0.0288941	0.999843
ENSMUSG00000071451	Psmg4	52.8895	-1.02823	0.402046	-2.55749	0.0105432	0.999843
ENSMUSG00000081344	Gm14303	77.0738	-1.02838	0.403355	-2.54956	0.0107859	0.999843
ENSMUSG00000084786	Ubl5	157.545	-1.02897	0.357264	-2.88014	0.00397495	0.999843
ENSMUSG00000090137	Uba52	61.8693	-1.03312	0.449969	-2.29598	0.0216773	0.999843
ENSMUSG00000036751	Cox6b1	287.482	-1.03429	0.398347	-2.59646	0.00941911	0.999843
ENSMUSG00000000204	Slfn4	244.438	-1.03715	0.456832	-2.27031	0.023189	0.999843
ENSMUSG00000036372	Tmem258	166.582	-1.03724	0.404034	-2.56721	0.0102519	0.999843
ENSMUSG00000071648	Rom1	4.2669	-1.03749	0.447942	-2.31612	0.0205519	0.999843
ENSMUSG00000079435	Rpl36a	195.174	-1.03825	0.389649	-2.66459	0.00770825	0.999843
ENSMUSG00000073702	Rpl31	266.863	-1.03968	0.375125	-2.77156	0.00557887	0.999843
ENSMUSG00000018339	Gpx3	23.2805	-1.03981	0.466974	-2.22669	0.0259678	0.999843
ENSMUSG00000047721	Bola2	73.3279	-1.0399	0.423445	-2.45582	0.0140564	0.999843
ENSMUSG00000072255	Rpl31-ps17	5.34815	-1.04327	0.457048	-2.28262	0.0224527	0.999843
ENSMUSG00000061848	Gm5805	21.2196	-1.04369	0.445716	-2.3416	0.019201	0.999843
ENSMUSG00000006442	Srm	24.5877	-1.04487	0.45035	-2.32012	0.0203341	0.999843
ENSMUSG00000090247	Bloc1s1	28.4823	-1.04615	0.418737	-2.49836	0.0124771	0.999843
ENSMUSG00000030615	Tmem126a	57.1669	-1.04811	0.405408	-2.58531	0.00972903	0.999843
ENSMUSG00000047843	Bri3	28.1782	-1.04888	0.452644	-2.31723	0.0204912	0.999843
ENSMUSG00000008683	Rps15a	371.353	-1.04901	0.383827	-2.73304	0.00627529	0.999843
ENSMUSG00000024530	Prelid3a	5.95565	-1.04936	0.443734	-2.36484	0.0180381	0.999843
ENSMUSG00000055839	Elob	132.884	-1.05073	0.3913	-2.68522	0.00724817	0.999843
ENSMUSG00000003072	Atp5d	68.6036	-1.05837	0.371819	-2.84648	0.0044206	0.999843
ENSMUSG00000049775	Tmsb4x	4650.45	-1.05992	0.415155	-2.55306	0.0106781	0.999843
ENSMUSG00000018042	Cyb5r3	104.984	-1.06283	0.387561	-2.74236	0.0061	0.999843
ENSMUSG00000024640	Psat1	69.4429	-1.06395	0.401565	-2.64951	0.00806098	0.999843
ENSMUSG00000020163	Uqcr11	38.0326	-1.064	0.413494	-2.5732	0.0100762	0.999843
ENSMUSG00000005054	Cstb	279.809	-1.06731	0.430238	-2.48075	0.0131106	0.999843
ENSMUSG00000031231	Cox7b	240.198	-1.06858	0.382885	-2.79086	0.00525677	0.999843
ENSMUSG00000071014	Ndufb6	70.3427	-1.07325	0.419495	-2.55844	0.0105144	0.999843
ENSMUSG00000038412	Higd1a	25.2068	-1.07535	0.427198	-2.51722	0.0118285	0.999843
ENSMUSG00000012848	Rps5	477.1	-1.0757	0.326955	-3.29007	0.00100164	0.999843
ENSMUSG00000046330	Rpl37a	273.065	-1.08252	0.381047	-2.8409	0.00449868	0.999843
ENSMUSG00000024181	Mrpl28	22.7897	-1.08352	0.428792	-2.52691	0.0115072	0.999843
ENSMUSG00000031848	Lsm4	59.4758	-1.0878	0.398323	-2.73095	0.00631514	0.999843
ENSMUSG00000072692	Rpl37rt	22.675	-1.08783	0.448048	-2.42793	0.0151853	0.999843
ENSMUSG00000023089	Ndufa5	153.367	-1.08929	0.394396	-2.7619	0.00574652	0.999843
ENSMUSG00000081159	Gm6023	8.04149	-1.09185	0.471331	-2.31652	0.02053	0.999843
ENSMUSG00000070645	Ren1	7.1804	-1.09281	0.437042	-2.50048	0.0124026	0.999843
ENSMUSG00000057841	Rpl32	394.952	-1.09745	0.352725	-3.11135	0.00186234	0.999843
ENSMUSG00000059534	Uqcr10	81.4422	-1.09758	0.380498	-2.8846	0.00391912	0.999843
ENSMUSG00000044894	Uqcrq	90.1964	-1.09916	0.423435	-2.59582	0.00943645	0.999843
ENSMUSG00000025290	Rps24	609.781	-1.09972	0.379072	-2.9011	0.00371861	0.999843
ENSMUSG00000041841	Rpl37	423.059	-1.10387	0.324226	-3.40461	0.000662577	0.999843
ENSMUSG00000060675	Pla2g16	103.228	-1.10551	0.385327	-2.86902	0.0041174	0.999843
ENSMUSG00000034566	Atp5h	63.163	-1.11159	0.405842	-2.73897	0.00616321	0.999843
ENSMUSG00000020526	Znhit3	8.47446	-1.1116	0.47199	-2.35513	0.018516	0.999843
ENSMUSG00000075266	Cenpw	17.1338	-1.11178	0.472422	-2.35337	0.0186042	0.999843
ENSMUSG00000021290	Atp5mpl	259.182	-1.11442	0.323666	-3.44313	0.000575023	0.999843
ENSMUSG00000053317	Sec61b	100.125	-1.11855	0.448014	-2.49669	0.0125359	0.999843
ENSMUSG00000062981	Mrpl42	56.9657	-1.11967	0.383366	-2.92062	0.00349338	0.999843
ENSMUSG00000109509	Rps12-ps4	12.0076	-1.12167	0.470634	-2.38332	0.0171572	0.999843
ENSMUSG00000057666	Gapdh	47.5685	-1.1227	0.446341	-2.51534	0.0118917	0.999843
ENSMUSG00000005779	Psmb4	207.699	-1.12838	0.338157	-3.33686	0.000847294	0.999843
ENSMUSG00000061983	Rps12	372.318	-1.12978	0.327348	-3.45132	0.000557852	0.999843
ENSMUSG00000061787	Rps17	106.028	-1.13725	0.404647	-2.81046	0.00494708	0.999843
ENSMUSG00000035352	Ccl12	15.3236	-1.14512	0.47031	-2.43481
ENSMUSG00000082481	Rps12-ps19	5.9673	-1.14736	0.469103	-2.44587	0.0144504	0.999843
ENSMUSG00000056209	Npm3	16.9292	-1.1498	0.470506	-2.44375	0.0145354	0.999843
ENSMUSG00000028798	Eif3i	67.5041	-1.15381	0.373139	-3.09216	0.00198706	0.999843
ENSMUSG00000037601	Nme1	129.58	-1.1553	0.33864	-3.4116	0.000645826	0.999843
ENSMUSG00000025362	Rps26	631.226	-1.16041	0.350627	-3.30953	0.000934538	0.999843
ENSMUSG00000040952	Rps19	244.003	-1.16162	0.40195	-2.88997	0.00385282	0.999843
ENSMUSG00000016252	Atp5e	162.672	-1.17904	0.408266	-2.88793	0.00387781	0.999843
ENSMUSG00000069972	Rps13-ps2	43.7264	-1.18839	0.417828	-2.8442	0.00445231	0.999843
ENSMUSG00000079283	2310009B15Rik	15.1794	-1.19187	0.472093	-2.52464	0.0115817	0.999843
ENSMUSG00000093674	Rpl41	292.13	-1.20556	0.462991	-2.60384	0.00921852	0.999843
ENSMUSG00000060938	Rpl26	622.506	-1.20662	0.37737	-3.19743	0.00138656	0.999843
ENSMUSG00000042747	Krtcap2	81.208	-1.2089	0.391964	-3.08422	0.00204085	0.999843
ENSMUSG00000062797	Hikeshi	29.9308	-1.21133	0.408986	-2.96179	0.0030586	0.999843
ENSMUSG00000027285	Haus2	11.0755	-1.21492	0.471975	-2.57411	0.0100497	0.999843
ENSMUSG00000050856	Atp5k	292.172	-1.21656	0.343088	-3.54591	0.000391263	0.999843
ENSMUSG00000078572	Ndufaf8	56.5906	-1.22037	0.378806	-3.22164	0.0012746	0.999843
ENSMUSG00000080921	Rpl38-ps2	29.915	-1.22113	0.447386	-2.72948	0.00634342	0.999843
ENSMUSG00000052192	Gm5963	62.1478	-1.25901	0.369352	-3.4087	0.000652722	0.999843
ENSMUSG00000036781	Rps27l	130.131	-1.30678	0.357957	-3.65068	0.000261551	0.999843
ENSMUSG00000037152	Ndufc1	145.138	-1.31005	0.380378	-3.44407	0.000573037	0.999843
ENSMUSG00000079641	Rpl39	157.794	-1.32491	0.359646	-3.68393	0.000229667	0.999843
ENSMUSG00000057322	Rpl38	211.707	-1.3479	0.392226	-3.43654	0.000589201	0.999843
ENSMUSG00000026981	Il1rn	30.5389	-1.37215	0.441567	-3.10745	0.00188708	0.999843
ENSMUSG00000031813	Mvb12a	13.8944	-1.39014	0.469851	-2.95869	0.00308953	0.999843
ENSMUSG00000044303	Cdkn2a	25.6384	-1.43083	0.462508	-3.09362	0.00197728	0.999843
ENSMUSG00000056054	S100a8	29.7367	-1.43404	0.445921	-3.2159	0.00130038	0.999843
ENSMUSG00000038717	Atp5l	7.23869	-1.49777	0.45678	-3.27896	0.00104189	0.999843
ENSMUSG00000079017	Ifi27l2a	85.1723	-1.53058	0.424806	-3.60301	0.000314558	0.999843
